# Supplementary material for: Regulated Random Walks and the LCFS Backlog Probability: Analysis and Application
Source: Atypon-hosted journal article supplement (doi:10.1287/opre.1070.0442), 2008-01-15
Supplement: opre.1070.0442-sm-ec.pdf [file opre.1070.0442-sm-ec.pdf]

**e - c o m p a n i o n**

ONLY AVAILABLE IN ELECTRONIC FORM

E-Companion—“Regulated Random Walks and the LCFS  
Backlog Probability: Analysis and Application” by Opher Baron,  
*Operations Research*, doi 10.1287/opre.1070.0442.

---

# E-companion to: "Regulated random walks and the LCFS backlog probability: analysis and application"

Opher Baron

Rotman School of Management, University of Toronto  
Toronto, ON, Canada M5S 3E6. opher.baron@rotman.utoronto.ca

November 21, 2007

## Abstract

Random walks have been used extensively within operations research models, such as inventory systems and single-server queues, to estimate performance measures. In this paper, we use sample-path analysis to express the steady-state probability of a one-sided regulated random walk to increase and be above a threshold, referred to as the last-come-first-serve (LCFS) backlog probability. We approximate the LCFS backlog probability under mild assumptions on the distribution of the random walk's steps and provide its exact expression when the steps are exponentially distributed, and a closed form approximation when the steps are normally distributed. In our numerical experiments, the average relative gap between the approximated LCFS backlog probabilities and their simulated values is 5.13%. We further show that the LCFS backlog probability is an upper bound on the loss probability—the probability that a two-sided regulated random walk is at a boundary. This bound is tighter than the backlog probability—the probability that a random walk ever crosses a threshold—that also bounds the loss probability. In an inventory application, we demonstrate that using the LCFS backlog probability rather than the backlog probability reduces the inventory level required to satisfy a service-level constraint on the percentage of orders backlogged. In our examples, this reduction leads to cost savings of 31% on average.

*Subject classifications:* Inventory/production, uncertainty, stochastic: base stock level for a single item. Probability, random walk: bounds on threshold related probabilities

*Area of review:* Stochastic Models.

*History:* Received January 2006, Revised November 2006, February 2007; Accepted March, 2007.

# 1 Detailed Numerical Results

## 1.1 Shifted-Exponential Steps

We consider shifted-exponential steps with  $\mu = 1$  and a shift  $r$  of 1.25, 1.5, and 1.75. For any drift and service level we found  $d_{BLG}$  from (35) and  $d_{LCFS}$  from (36). The results are reported in Table 1.

We found that the average Backlog and Loss Ratios are 0.53 and 0.75, respectively, the average  $c$  Ratio is 0.974, which is translated to an average Error  $P_{LCFS}(d)$  of 3.1%, because  $P(Y > d)$  is exact. Observe that in the example of service level of 80% and a drift of 0.75,  $d_{LCFS} = 0$  (and therefore  $d_B = 0$ ); moreover,  $d_{PL} = 0$  for drifts of 0.5 and 0.25 as well. Finally, the Cost Ratio ranged between 14.5% and 100% (100% for service level 80% and a drift of 0.75), averaged at 43.7%.

## 1.2 Normal(10, 2), With $d$ From Normal(10, 1)

To compare the change in accuracy of our approximations with the standard deviation of  $X$ , we ran the case with normal steps with a standard deviation  $\sigma = 2$  using the optimal  $d$ s for normal steps with  $\sigma = 1$ . That is we consider normal steps with a mean  $\mu$  of  $-0.25$ ,  $-0.5$ , and  $-0.75$  and for any  $\mu$  and service level we found different  $d$  values as if steps are normal(10, 1) distributed. (We chose  $d_{BLG}$  based on (39) and  $d_{LCFS}$  by multiplying  $c$  from (38) by  $P(Y > d)$  from (39). We only evaluated the first 250 elements of the infinite series in (38) to express  $c$ .)

The detailed results are reported in Table 2. We see that the average Backlog and Loss Ratios were 0.59 and 0.78, respectively, the average  $c$  Ratio is 1.002, and the average Error  $P_{LCFS}(d)$  is 13.%. Thus, in this scenario, with relatively small  $d$ 's and high backlog probabilities, our approximations for  $c$  are better than the approximation for  $P(Y > d)$ .

| Service Level | Drift | $d$    | Values | Simulated Probabilities of |              |       | Analytic Probabilities of |              | Cost  |
|---------------|-------|--------|--------|----------------------------|--------------|-------|---------------------------|--------------|-------|
|               |       |        |        | Backlog                    | LCFS Backlog | Loss  | Backlog                   | LCFS Backlog |       |
| 80%           | 0.25  | d_BLG  | 3.084  | 0.197                      | 0.090        | 0.052 | 0.200                     | 0.092        | 2.330 |
|               |       | d_LCFS | 0.999  | 0.433                      | 0.198        | 0.148 | 0.434                     | 0.200        | 0.745 |
|               |       | d_PL   | 0.000  | 0.629                      | 0.287        | 0.287 | 0.629                     | 0.290        | 0.000 |
|               |       | d_B    | 0.623  | 0.501                      | 0.228        | 0.187 | 0.499                     | 0.230        | 0.461 |
|               | 0.5   | d_BLG  | 1.262  | 0.201                      | 0.108        | 0.089 | 0.200                     | 0.110        | 1.039 |
|               |       | d_LCFS | 0.233  | 0.363                      | 0.194        | 0.186 | 0.364                     | 0.200        | 0.184 |
|               |       | d_PL   | 0.000  | 0.629                      | 0.223        | 0.223 | 0.417                     | 0.229        | 0.000 |
|               |       | d_B    | 0.143  | 0.384                      | 0.205        | 0.200 | 0.384                     | 0.211        | 0.112 |
|               | 0.75  | d_BLG  | 0.508  | 0.200                      | 0.121        | 0.114 | 0.200                     | 0.126        | 0.433 |
|               |       | d_LCFS | 0.000  | 0.629                      | 0.174        | 1.000 | 0.287                     | 0.181        | 0.000 |
|               |       | d_PL   | 0.000  | 0.629                      | 0.174        | 0.174 | 0.287                     | 0.181        | 0.000 |
|               |       | d_B    | 0.000  | 0.629                      | 0.174        | 0.174 | 0.287                     | 0.181        | 0.000 |
| 90%           | 0.25  | d_BLG  | 4.950  | 0.098                      | 0.045        | 0.023 | 0.100                     | 0.046        | 3.862 |
|               |       | d_LCFS | 2.865  | 0.219                      | 0.100        | 0.057 | 0.217                     | 0.100        | 2.151 |
|               |       | d_PL   | 1.127  | 0.410                      | 0.187        | 0.137 | 0.414                     | 0.191        | 0.841 |
|               |       | d_B    | 2.070  | 0.296                      | 0.134        | 0.084 | 0.291                     | 0.134        | 1.542 |
|               | 0.5   | d_BLG  | 2.451  | 0.100                      | 0.054        | 0.041 | 0.100                     | 0.055        | 2.057 |
|               |       | d_LCFS | 1.422  | 0.182                      | 0.097        | 0.079 | 0.182                     | 0.100        | 1.174 |
|               |       | d_PL   | 1.023  | 0.229                      | 0.122        | 0.103 | 0.230                     | 0.126        | 0.839 |
|               |       | d_B    | 1.165  | 0.210                      | 0.113        | 0.094 | 0.212                     | 0.116        | 0.959 |
|               | 0.75  | d_BLG  | 1.481  | 0.100                      | 0.060        | 0.053 | 0.100                     | 0.063        | 1.301 |
|               |       | d_LCFS | 0.836  | 0.158                      | 0.096        | 0.088 | 0.158                     | 0.100        | 0.720 |
|               |       | d_PL   | 0.651  | 0.181                      | 0.109        | 0.102 | 0.181                     | 0.114        | 0.557 |
|               |       | d_B    | 0.712  | 0.172                      | 0.104        | 0.097 | 0.173                     | 0.109        | 0.612 |
| 95%           | 0.25  | d_BLG  | 6.817  | 0.050                      | 0.023        | 0.011 | 0.050                     | 0.023        | 5.496 |
|               |       | d_LCFS | 4.732  | 0.106                      | 0.048        | 0.025 | 0.108                     | 0.050        | 3.681 |
|               |       | d_PL   | 2.986  | 0.210                      | 0.095        | 0.055 | 0.207                     | 0.096        | 2.246 |
|               |       | d_B    | 3.342  | 0.184                      | 0.084        | 0.047 | 0.182                     | 0.084        | 2.527 |
|               | 0.5   | d_BLG  | 3.640  | 0.050                      | 0.027        | 0.019 | 0.050                     | 0.027        | 3.123 |
|               |       | d_LCFS | 2.611  | 0.092                      | 0.049        | 0.037 | 0.091                     | 0.050        | 2.196 |
|               |       | d_PL   | 2.180  | 0.118                      | 0.063        | 0.048 | 0.117                     | 0.064        | 1.820 |
|               |       | d_B    | 2.218  | 0.115                      | 0.062        | 0.047 | 0.115                     | 0.063        | 1.854 |
|               | 0.75  | d_BLG  | 2.453  | 0.049                      | 0.030        | 0.025 | 0.050                     | 0.032        | 2.193 |
|               |       | d_LCFS | 1.808  | 0.079                      | 0.048        | 0.042 | 0.079                     | 0.050        | 1.597 |
|               |       | d_PL   | 1.601  | 0.092                      | 0.056        | 0.049 | 0.092                     | 0.058        | 1.410 |
|               |       | d_B    | 1.605  | 0.093                      | 0.056        | 0.049 | 0.092                     | 0.058        | 1.411 |
| 99%           | 0.25  | d_BLG  | 11.151 | 0.009                      | 0.004        | 0.002 | 0.010                     | 0.005        | 9.569 |
|               |       | d_LCFS | 9.066  | 0.023                      | 0.010        | 0.005 | 0.022                     | 0.010        | 7.552 |
|               |       | d_PL   | 7.449  | 0.038                      | 0.018        | 0.009 | 0.040                     | 0.018        | 6.069 |
|               |       | d_B    | 7.097  | 0.046                      | 0.021        | 0.010 | 0.045                     | 0.021        | 5.737 |
|               | 0.5   | d_BLG  | 6.402  | 0.010                      | 0.005        | 0.004 | 0.010                     | 0.005        | 5.744 |
|               |       | d_LCF  | 5.373  | 0.019                      | 0.010        | 0.007 | 0.018                     | 0.010        | 4.749 |
|               |       | d_PL   | 4.781  | 0.027                      | 0.014        | 0.010 | 0.026                     | 0.014        | 4.188 |
|               |       | d_B    | 4.867  | 0.025                      | 0.013        | 0.009 | 0.024                     | 0.013        | 4.273 |
|               | 0.75  | d_BLG  | 4.712  | 0.010                      | 0.006        | 0.005 | 0.010                     | 0.006        | 4.357 |
|               |       | d_LCFS | 4.067  | 0.015                      | 0.009        | 0.008 | 0.016                     | 0.010        | 3.724 |
|               |       | d_PL   | 3.856  | 0.019                      | 0.011        | 0.010 | 0.018                     | 0.012        | 3.518 |
|               |       | d_B    | 3.776  | 0.019                      | 0.012        | 0.010 | 0.019                     | 0.012        | 3.444 |

Table 1: Comparison of  $d_{BLG}$ ,  $d_{LCFS}$ ,  $d_{PL}$ , and  $d_{BA}$ ; the simulated backlog, LCFS backlog, and loss probabilities; the analytic backlog and LCFS backlog probabilities; and the cost for random walks with shifted-exponential steps.

| Service Level | Draft | $d$    | Values | Simulated Probabilities of |              |         | Analytic Probabilities of |              | Cost  |
|---------------|-------|--------|--------|----------------------------|--------------|---------|---------------------------|--------------|-------|
|               |       |        |        | Backlog                    | LCFS Backlog | Loss    | Backlog                   | LCFS Backlog |       |
| 80%           | 0.25  | d_BLG  | 2.636  | 0.628                      | 0.344        | 0.22230 | 0.622                     | 0.342        | 1.513 |
|               |       | d_LCFS | 1.595  | 0.704                      | 0.387        | 0.29360 | 0.708                     | 0.389        | 0.901 |
|               |       | d_PL   | 0.912  | 0.760                      | 0.415        | 0.35440 | 0.771                     | 0.424        | 0.510 |
|               |       | d_BA   | 1.142  | 0.746                      | 0.407        | 0.33400 | 0.749                     | 0.412        | 0.639 |
|               | 0.5   | d_BLG  | 1.026  | 0.567                      | 0.335        | 0.28990 | 0.578                     | 0.344        | 0.635 |
|               |       | d_LCFS | 0.606  | 0.619                      | 0.363        | 0.33370 | 0.642                     | 0.382        | 0.370 |
|               |       | d_PL   | 0.496  | 0.632                      | 0.370        | 0.34520 | 0.660                     | 0.392        | 0.301 |
|               | 0.75  | d_BA   | 0.505  | 0.629                      | 0.369        | 0.34370 | 0.658                     | 0.391        | 0.307 |
|               |       | d_BLG  | 0.490  | 0.498                      | 0.313        | 0.29590 | 0.537                     | 0.338        | 0.324 |
|               |       | d_LCFS | 0.252  | 0.536                      | 0.334        | 0.32450 | 0.588                     | 0.369        | 0.164 |
|               |       | d_PL   | 0.103  | 0.558                      | 0.346        | 0.34140 | 0.621                     | 0.391        | 0.067 |
|               |       | d_BA   | 0.121  | 0.554                      | 0.344        | 0.33900 | 0.617                     | 0.388        | 0.078 |
|               |       |        |        |                            |              |         |                           |              |       |
| 90%           | 0.25  | d_BLG  | 4.022  | 0.518                      | 0.285        | 0.15550 | 0.523                     | 0.287        | 2.377 |
|               |       | d_LCFS | 2.981  | 0.593                      | 0.326        | 0.20150 | 0.595                     | 0.327        | 1.730 |
|               |       | d_PL   | 2.136  | 0.658                      | 0.362        | 0.25250 | 0.662                     | 0.364        | 1.219 |
|               |       | d_BA   | 2.163  | 0.662                      | 0.363        | 0.25270 | 0.660                     | 0.362        | 1.232 |
|               | 0.5   | d_BLG  | 1.720  | 0.483                      | 0.288        | 0.22870 | 0.486                     | 0.289        | 1.085 |
|               |       | d_LCFS | 1.299  | 0.535                      | 0.318        | 0.26530 | 0.540                     | 0.321        | 0.808 |
|               |       | d_PL   | 1.201  | 0.542                      | 0.322        | 0.27300 | 0.553                     | 0.329        | 0.747 |
|               | 0.75  | d_BA   | 1.195  | 0.544                      | 0.322        | 0.27360 | 0.554                     | 0.329        | 0.743 |
|               |       | d_BLG  | 0.952  | 0.432                      | 0.275        | 0.24720 | 0.452                     | 0.284        | 0.640 |
|               |       | d_LCFS | 0.714  | 0.467                      | 0.295        | 0.27210 | 0.494                     | 0.311        | 0.475 |
|               |       | d_PL   | 0.694  | 0.470                      | 0.297        | 0.27530 | 0.498                     | 0.313        | 0.461 |
|               |       | d_BA   | 0.694  | 0.469                      | 0.296        | 0.27420 | 0.498                     | 0.313        | 0.462 |
|               |       |        |        |                            |              |         |                           |              |       |
| 95%           | 0.25  | d_BLG  | 5.409  | 0.440                      | 0.242        | 0.11620 | 0.440                     | 0.242        | 3.264 |
|               |       | d_LCFS | 4.368  | 0.500                      | 0.276        | 0.14590 | 0.501                     | 0.275        | 2.584 |
|               |       | d_PL   | 3.404  | 0.566                      | 0.311        | 0.18230 | 0.565                     | 0.310        | 1.984 |
|               |       | d_BA   | 3.231  | 0.577                      | 0.317        | 0.18970 | 0.577                     | 0.317        | 1.875 |
|               | 0.5   | d_BLG  | 2.413  | 0.408                      | 0.244        | 0.17920 | 0.409                     | 0.243        | 1.552 |
|               |       | d_LCFS | 1.992  | 0.449                      | 0.268        | 0.20640 | 0.454                     | 0.270        | 1.269 |
|               |       | d_PL   | 1.850  | 0.464                      | 0.278        | 0.21720 | 0.471                     | 0.280        | 1.174 |
|               | 0.75  | d_BA   | 1.854  | 0.466                      | 0.279        | 0.21730 | 0.470                     | 0.279        | 1.176 |
|               |       | d_BLG  | 1.414  | 0.373                      | 0.238        | 0.20480 | 0.380                     | 0.239        | 0.966 |
|               |       | d_LCFS | 1.176  | 0.403                      | 0.257        | 0.22650 | 0.419                     | 0.263        | 0.797 |
|               |       | d_PL   | 1.207  | 0.401                      | 0.255        | 0.22450 | 0.411                     | 0.258        | 0.817 |
|               |       | d_BA   | 1.176  | 0.403                      | 0.257        | 0.22670 | 0.416                     | 0.261        | 0.796 |
|               |       |        |        |                            |              |         |                           |              |       |
| 99%           | 0.25  | d_BLG  | 8.627  | 0.291                      | 0.160        | 0.06390 | 0.294                     | 0.162        | 5.479 |
|               |       | d_LCFS | 7.587  | 0.331                      | 0.183        | 0.07750 | 0.335                     | 0.184        | 4.735 |
|               |       | d_PL   | 6.381  | 0.382                      | 0.211        | 0.09620 | 0.389                     | 0.214        | 3.909 |
|               |       | d_BA   | 6.070  | 0.393                      | 0.216        | 0.10020 | 0.405                     | 0.222        | 3.717 |
|               | 0.5   | d_BLG  | 4.022  | 0.271                      | 0.162        | 0.10460 | 0.273                     | 0.162        | 2.711 |
|               |       | d_LCFS | 3.602  | 0.303                      | 0.182        | 0.12070 | 0.337                     | 0.200        | 2.396 |
|               |       | d_PL   | 3.530  | 0.309                      | 0.185        | 0.12350 | 0.309                     | 0.184        | 2.338 |
|               | 0.75  | d_BA   | 3.430  | 0.318                      | 0.191        | 0.12820 | 0.317                     | 0.188        | 2.266 |
|               |       | d_BLG  | 2.487  | 0.255                      | 0.165        | 0.13030 | 0.254                     | 0.160        | 1.762 |
|               |       | d_LCFS | 2.249  | 0.280                      | 0.180        | 0.14410 | 0.278                     | 0.175        | 1.580 |
|               |       | d_PL   | 2.333  | 0.268                      | 0.173        | 0.13810 | 0.269                     | 0.169        | 1.649 |
|               |       | d_BA   | 2.249  | 0.279                      | 0.180        | 0.14410 | 0.278                     | 0.175        | 1.582 |
|               |       |        |        |                            |              |         |                           |              |       |

Table 2: Comparison of  $d_{BLG}$ ,  $d_{LCFS}$ ,  $d_{PL}$ , and  $d_{BA}$ ; the simulated backlog, LCFS backlog, and loss probabilities; the analytic backlog and LCFS backlog probabilities; and the cost for random walks with Normal(10,2) steps with  $d$  corresponding to the service level constraints for Normal(10,1) steps.
